# Supplementary material for: In vivo fermentation production of humanized noncoding RNAs carrying payload miRNAs for targeted anticancer therapy
Source: PubMed Central journal article supplement (PMC7978307; doi:10.7150/thno.56596), 2021-03-04
Supplement: thnov11p4858s1.pdf [file thnov11p4858s1.pdf]

## Supplementary Materials for

### ***In vivo* fermentation production of humanized noncoding RNAs carrying payload miRNAs for targeted anticancer therapy**

Peng-Cheng Li<sup>1,2,#</sup>, Mei-Juan Tu<sup>2,#</sup>, Pui Yan Ho<sup>2,#</sup>, Neelu Batra<sup>2</sup>, Michelle M.L. Tran<sup>2</sup>, Jing-Xin Qiu<sup>3</sup>, Theodore Wun<sup>4</sup>, Primo N. Lara<sup>5</sup>, Xiang Hu<sup>1</sup>, Ai-Xi Yu<sup>1,\*</sup>, Ai-Ming Yu<sup>2,\*</sup>

#### **The PDF file includes:**

Table S1. Sequences of target recombinant ncRNAs.

Table S2. Primers used for cloning ncRNA expression plasmids.

Figure S1. Body weights of animals during the therapy study.

**Table S1.** Sequences of humanized recombinant ncRNAs bearing RNAi warheads. Underlined, tRNA; Red and green: payload miRNA or siRNA sequence and complementary sequence, respectively; orange, aptamer.

| Target ncRNA                                  | # nts | Sequence (5' to 3')                                                                                                                                                                                                                                          | MW (Da) |
|-----------------------------------------------|-------|--------------------------------------------------------------------------------------------------------------------------------------------------------------------------------------------------------------------------------------------------------------|---------|
| <b>htRNA/pre-miR-34a</b>                      |       |                                                                                                                                                                                                                                                              |         |
| htRNA <sup>Lys</sup> /pre-miR-34a             | 182   | <u>GCCUGGAUAGCUCAGUUGGUAGAGCAUCAGACUGGCCAGCU</u><br><u>GUGAGUGUUUCUU</u> <u>UGGCAGUGUCUUAGCUGGUUGU</u> UGUGAG<br>CAUAGUAAGGAAGCA <u>UAGCAAGUAUACUGCCU</u> AGAAGU<br>GCUGCACGUUGUUGGCC <u>AAUCUGAGGGUCCAGGGUUC</u> AAAG<br><u>UCCUGUUCAGGCGCCA</u>            | 58,889  |
| htRNA <sup>Gln</sup> /pre-miR-34a             | 181   | <u>GGUCCCAUGGUGUAAUGGUUAGCACUCUGGACUGGCCAGCU</u><br><u>GUGAGUGUUUCUU</u> <u>UGGCAGUGUCUUAGCUGGUUGU</u> UGUGAG<br>CAUAGUAAGGAAGCA <u>UAGCAAGUAUACUGCCU</u> AGAAGU<br>GCUGCACGUUGUUGGCC <u>AAUCCAGCGAUCCGAGUUC</u> AAAU<br><u>UCGGUGGGACCUCCA</u>              | 58,465  |
| htRNA <sup>Cys</sup> /pre-miR-34a             | 181   | <u>GGGGCAUAGCUCAGUGGUAGAGCAUUUGACUGGCCAGCUG</u><br><u>UGAGUGUUUCUU</u> <u>UGGCAGUGUCUUAGCUGGUUGU</u> UGUGAGC<br>AAUAGUAAGGAAGCA <u>UAGCAAGUAUACUGCCU</u> AGAAGUG<br>CUGCACGUUGUUGGCC <u>GAUCAAGAGGUCCUGGUUC</u> AAAU<br><u>CCAGGUGCCCCUCCA</u>               | 58,543  |
| htRNA <sup>Tyr</sup> /pre-miR-34a             | 182   | <u>CCUUCGAUAGCUCAGUUGGUAGAGCGGAGGACUGGCCAGCU</u><br><u>GUGAGUGUUUCUU</u> <u>UGGCAGUGUCUUAGCUGGUUGU</u> UGUGAG<br>CAUAGUAAGGAAGCA <u>UAGCAAGUAUACUGCCU</u> AGAAGU<br>GCUGCACGUUGUUGGCC <u>GAUCCUAGGUCGCUGGUUC</u> GAA<br><u>UCCGGCUCGAAGGACCA</u>             | 58,905  |
| htRNA <sup>Ser</sup> /pre-miR-34a             | 191   | <u>GCAGCGAUGGCCGAGUGGUUAAGGCGUUGGACUGGCCAGCU</u><br><u>GUGAGUGUUUCUU</u> <u>UGGCAGUGUCUUAGCUGGUUGU</u> UGUGAG<br>CAUAGUAAGGAAGCA <u>UAGCAAGUAUACUGCCU</u> AGAAGU<br>GCUGCACGUUGUUGGCC <u>AAUCCAUGGGUCUCCCCGCG</u><br><u>AGGUUCGAACCCUGCUCGCUGCGCCA</u>       | 61,787  |
| htRNA <sup>Leu</sup> /pre-miR-34a             | 192   | <u>ACCAGGAUGGCCGAGUGGUUAAGGCGUUGGACUGGCCAGCU</u><br><u>GUGAGUGUUUCUU</u> <u>UGGCAGUGUCUUAGCUGGUUGU</u> UGUGAG<br>CAUAGUAAGGAAGCA <u>UAGCAAGUAUACUGCCU</u> AGAAGU<br>GCUGCACGUUGUUGGCC <u>GAUCCAUGGACAU</u> AUGUCCGCG<br><u>UGGGUUCGAACCCACUCCUGGUACCA</u>    | 62,110  |
| <b>htRNA<sup>Leu</sup>/pre-miR-34a</b>        |       |                                                                                                                                                                                                                                                              |         |
| htRNA <sup>Leu</sup> /sephadex-aptamer        | 119   | <u>ACCAGGAUGGCCGAGUGGUUAAGGCGUUGGACU</u> <u>AGUAAUUU</u><br><u>ACGUCGACGGUGACGUCGAUGGUUGCGG</u> <u>GAUCCAUGGACA</u><br><u>UAUGUCCGCGUGGGUUCGAACCCACUCCUGGUACCA</u>                                                                                           | 38,625  |
| htRNA <sup>Leu</sup> /pre-miR-34a/miR-200b-3p | 192   | <u>ACCAGGAUGGCCGAGUGGUUAAGGCGUUGGACUGGCCAGCU</u><br><u>GUGAGUGUUUCUU</u> <u>UAUACUGCCUGGUAAUGAUGA</u> UGUGAG<br>CAUAGUAAGGA <u>UCAUCAUUUAGUGCAGUAUUCU</u> AGAAGU<br>GCUGCACGUUGUUGGCC <u>GAUCCAUGGACAU</u> AUGUCCGCG<br><u>UGGGUUCGAACCCACUCCUGGUACCA</u>    | 62,049  |
| htRNA <sup>Leu</sup> /pre-miR-34a/miR-148-3p  | 192   | <u>ACCAGGAUGGCCGAGUGGUUAAGGCGUUGGACUGGCCAGCU</u><br><u>GUGAGUGUUUCUU</u> <u>UCAGUGCACUACAGAACUUUGU</u> UGUGAG<br>CAUAGUAAGGAAGCA <u>AGUUCGUUAGUGCACUGCU</u> AGAAGU<br>GCUGCACGUUGUUGGCC <u>GAUCCAUGGACAU</u> AUGUCCGCG<br><u>UGGGUUCGAACCCACUCCUGGUACCA</u>  | 62,078  |
| htRNA <sup>Leu</sup> /pre-miR-34a/miR-22-3p   | 192   | <u>ACCAGGAUGGCCGAGUGGUUAAGGCGUUGGACUGGCCAGCU</u><br><u>GUGAGUGUUUCUU</u> <u>AGCUGCCAGUUGAAGAACUGU</u> UGUGAG<br>CAUAGUAAGGAAGCA <u>AGUUCUUAGCUUGGCAGCUCU</u> AGAAGU<br>GCUGCACGUUGUUGGCC <u>GAUCCAUGGACAU</u> AUGUCCGCG<br><u>UGGGUUCGAACCCACUCCUGGUACCA</u> | 62,133  |
| htRNA <sup>Leu</sup> /pre-miR-34a/miR-6775-3p | 192   | <u>ACCAGGAUGGCCGAGUGGUUAAGGCGUUGGACUGGCCAGCU</u><br><u>GUGAGUGUUUCUU</u> <u>AGGCCUGUCCUCUGCCAGU</u> UGUGAG<br>CAUAGUAAGGAAGC <u>UGGGCAAGGCGCAGGGCCU</u> AGAAG                                                                                                | 62,167  |

|                                               |     |                                                                                                                                                                                                                                                                                                                                           |        |
|-----------------------------------------------|-----|-------------------------------------------------------------------------------------------------------------------------------------------------------------------------------------------------------------------------------------------------------------------------------------------------------------------------------------------|--------|
| htRNA <sup>Leu</sup> /pre-miR-34a/miR-133a-3p | 193 | <u>UGCUGCACGUUGUUGGCCCGAUCCAAUGGACAU AUGUCCGC</u><br><u>GUGGGUUCGAACCCACUCCUGGUACCA</u><br><u>ACCAGGAUGGCCGAGUGGUUAAGGCGUUGGACU</u> <u>GGCCAGCU</u><br>GUGAGUGUUUCUUUUUGGUC <u>CCCUCAACCAGCUG</u> UGUGAG<br>CAUAGUAAGGAAGCAGCUGGUUAAGUGGGACCAACUAGAAG<br>UGCUGCACGUUGUUGGCCCGAUCCAAUGGACAU AUGUCCGC<br><u>GUGGGUUCGAACCCACUCCUGGUACCA</u> | 62,413 |
| htRNA <sup>Leu</sup> /pre-miR-34a/miR-124-3p  | 192 | <u>ACCAGGAUGGCCGAGUGGUUAAGGCGUUGGACU</u> <u>GGCCAGCU</u><br>GUGAGUGUUUCUUUAAGGCACGCGGUGAAUGCCGUUGUGAG<br>CAUAGUAAGGAAGCGGUGUUC <u>CCGUCGUGCCUUCU</u> AGAAG<br>UGCUGCACGUUGUUGGCCCGAUCCAAUGGACAU AUGUCCGC<br><u>GUGGGUUCGAACCCACUCCUGGUACCA</u>                                                                                            | 62,132 |
| htRNA <sup>Leu</sup> /pre-miR-34a/let-7c-5p   | 193 | <u>ACCAGGAUGGCCGAGUGGUUAAGGCGUUGGACU</u> <u>GGCCAGCU</u><br>GUGAGUGUUUCUUUGAGGUAGUAGGUUGUAUGGUUUGUGAG<br>CAUAGUAAGGAAGAACUGUACACCUUACUACCUUUCAGAAG<br>UGCUGCACGUUGUUGGCCCGAUCCAAUGGACAU AUGUCCGC<br><u>GUGGGUUCGAACCCACUCCUGGUACCA</u>                                                                                                    | 62,402 |
| htRNA <sup>Leu</sup> /pre-miR-34a/NRF2-siRNA  | 192 | <u>ACCAGGAUGGCCGAGUGGUUAAGGCGUUGGACU</u> <u>GGCCAGCU</u><br>GUGAGUGUUUCUUAAUUGUCAACUACUGUCAGUUUGUGAG<br>CAUAGUAAGGAAGAACUGACAGAGUAUGACA <u>AAUUCU</u> AGAAGU<br>GCUGCACGUUGUUGGCCCGAUCCAAUGGACAU AUGUCCGC<br><u>UGGGUUCGAACCCACUCCUGGUACCA</u>                                                                                            | 62,055 |
| htRNA <sup>Leu</sup> /pre-miR-34a/miR-122-5p  | 193 | <u>ACCAGGAUGGCCGAGUGGUUAAGGCGUUGGACU</u> <u>GGCCAGCU</u><br>GUGAGUGUUUCUUUGGAGUGUGACA <u>AAUGGUGUUUG</u> UGUGAG<br>CAUAGUAAGGAAGCAACGC <u>CAUGUACACACUCCU</u> AGAAG<br>UGCUGCACGUUGUUGGCCCGAUCCAAUGGACAU AUGUCCGC<br><u>GUGGGUUCGAACCCACUCCUGGUACCA</u>                                                                                   | 62,461 |
| htRNA <sup>Leu</sup> /pre-miR-34a/miR-328-3p  | 192 | <u>ACCAGGAUGGCCGAGUGGUUAAGGCGUUGGACU</u> <u>GGCCAGCU</u><br>GUGAGUGUUUCUUUGGCCCUUCUGCCCUCCGUUGUGAG<br>CAUAGUAAGGAAGCGGGGGGAGAU <u>GGGGCCAU</u> AGAAG<br>UGCUGCACGUUGUUGGCCCGAUCCAAUGGACAU AUGUCCGC<br><u>GUGGGUUCGAACCCACUCCUGGUACCA</u>                                                                                                  | 62,202 |
| htRNA <sup>Leu</sup> /pre-miR-34a/miR-7-1-5p  | 192 | <u>ACCAGGAUGGCCGAGUGGUUAAGGCGUUGGACU</u> <u>GGCCAGCU</u><br>GUGAGUGUUUCUUUGAAGACUAGUGAUUUUGUUGUGUGAG<br>CAUAGUAAGGAACAACAAA <u>UACUCAGUCUCCU</u> AGAAGU<br>GCUGCACGUUGUUGGCCCGAUCCAAUGGACAU AUGUCCGC<br><u>UGGGUUCGAACCCACUCCUGGUACCA</u>                                                                                                 | 62,047 |
| htRNA <sup>Leu</sup> /pre-miR-34a/miR-92a-3p  | 192 | <u>ACCAGGAUGGCCGAGUGGUUAAGGCGUUGGACU</u> <u>GGCCAGCU</u><br>GUGAGUGUUUCUUUAUUGCACUUGUCCCGCCUGUUGUGAG<br>CAUAGUAAGGAACAGGCGCGACAUAGUGCA <u>AUCU</u> AGAAGU<br>GCUGCACGUUGUUGGCCCGAUCCAAUGGACAU AUGUCCGC<br><u>UGGGUUCGAACCCACUCCUGGUACCA</u>                                                                                               | 62,068 |
| htRNA <sup>Leu</sup> /pre-miR-34a/miR-126-3p  | 192 | <u>ACCAGGAUGGCCGAGUGGUUAAGGCGUUGGACU</u> <u>GGCCAGCU</u><br>GUGAGUGUUUCUUUCGUACCGUGAGUAAUAUGCGUGUGAG<br>CAUAGUAAGGAU <u>GCAUUAUUCUCU</u> AUGGUACGCUAGAAGU<br>GCUGCACGUUGUUGGCCCGAUCCAAUGGACAU AUGUCCGC<br><u>UGGGUUCGAACCCACUCCUGGUACCA</u>                                                                                               | 62,056 |
| htRNA <sup>Leu</sup> /pre-miR-34a/miR-132-3p  | 192 | <u>ACCAGGAUGGCCGAGUGGUUAAGGCGUUGGACU</u> <u>GGCCAGCU</u><br>GUGAGUGUUUCUUUAACAGUCUACAGCCAUGGUCGUGUGAG<br>CAUAGUAAGGAACGACCGUGGUGUCAGAUUGUUCUAGAAGU<br>GCUGCACGUUGUUGGCCCGAUCCAAUGGACAU AUGUCCGC<br><u>UGGGUUCGAACCCACUCCUGGUACCA</u>                                                                                                      | 62,109 |
| htRNA <sup>Leu</sup> /pre-miR-34a/miR-137-3p  | 192 | <u>ACCAGGAUGGCCGAGUGGUUAAGGCGUUGGACU</u> <u>GGCCAGCU</u><br>GUGAGUGUUUCUUUAUUGCUUAAGAAUACGCGUAGUGUGAG<br>CAUAGUAAGGA <u>CUACGCGUAUCU</u> CGGGUGGUACUAGAAGU<br>GCUGCACGUUGUUGGCCCGAUCCAAUGGACAU AUGUCCGC<br><u>UGGGUUCGAACCCACUCCUGGUACCA</u>                                                                                              | 62,111 |
| htRNA <sup>Leu</sup> /pre-miR-34a/miR-140-5p  | 192 | <u>ACCAGGAUGGCCGAGUGGUUAAGGCGUUGGACU</u> <u>GGCCAGCU</u><br>GUGAGUGUUUCUUAGUGGUUUUACCCUAUGGUAGUGUGAG<br>CAUAGUAAGGA <u>CUACCAUAGGU</u> AUAACCACUCUAGAAGU<br>GCUGCACGUUGUUGGCCCGAUCCAAUGGACAU AUGUCCGC<br><u>UGGGUUCGAACCCACUCCUGGUACCA</u>                                                                                                | 62,022 |

|                                              |     |                                                                                                                                                                                                                                                   |        |
|----------------------------------------------|-----|---------------------------------------------------------------------------------------------------------------------------------------------------------------------------------------------------------------------------------------------------|--------|
| htRNA <sup>Leu</sup> /pre-miR-34a/miR-141-3p | 192 | <u>ACCAGGAUGGCCGAGUGGUUAAGGCGUUGGACUGGCCAGCU</u><br><u>GUGAGUGUUUCUUUAACACUGUCUGGUAAAGAUGGUGUGAG</u><br><u>CAAUAGUAAGGAAACAUCUUUACAGUACAGUGUUCUAGAAGU</u><br><u>GCUGCACGUUGUUGGCCGAUCCAUGGACAUAUGUCCGCG</u><br><u>UGGGUUCGAACCCACUCCUGGUACCA</u>  | 62,063 |
| htRNA <sup>Leu</sup> /pre-miR-34a/miR-142-3p | 194 | <u>ACCAGGAUGGCCGAGUGGUUAAGGCGUUGGACUGGCCAGCU</u><br><u>GUGAGUGUUUCUUUGUAGUGUUUCCUACUUUAUGGAUGUGA</u><br><u>GCAAUAGUAAGGAAUCCAUAAGUGGACAGCACUACUCAGAA</u><br><u>GUGCUGCACGUUGUUGGCCGAUCCAUGGACAUAUGUCCG</u><br><u>CGUGGGUUCGAACCCACUCCUGGUACCA</u> | 62,674 |
| htRNA <sup>Leu</sup> /pre-miR-34a/miR-194-3p | 192 | <u>ACCAGGAUGGCCGAGUGGUUAAGGCGUUGGACUGGCCAGCU</u><br><u>GUGAGUGUUUCUUUGUAACAGCAACUCCAUGUGGAUGUGAG</u><br><u>CAAUAGUAAGGAAUCCACGUGGGUJAGCUGUUACUUAGAAGU</u><br><u>GCUGCACGUUGUUGGCCGAUCCAUGGACAUAUGUCCGCG</u><br><u>UGGGUUCGAACCCACUCCUGGUACCA</u>  | 62,094 |
| htRNA <sup>Leu</sup> /pre-miR-34a/miR-205-5p | 192 | <u>ACCAGGAUGGCCGAGUGGUUAAGGCGUUGGACUGGCCAGCU</u><br><u>GUGAGUGUUUCUUUCCUUCAUUCCACCGGAGUCUGUGUGAG</u><br><u>CAAUAGUAAGGAAACAGACUCCGUGGUAAGAAGGCUAGAAGU</u><br><u>GCUGCACGUUGUUGGCCGAUCCAUGGACAUAUGUCCGCG</u><br><u>UGGGUUCGAACCCACUCCUGGUACCA</u>  | 62,068 |

---

**htRNA<sup>Ser</sup>/pre-miR-34a**

|                                               |     |                                                                                                                                                                                                                                                  |        |
|-----------------------------------------------|-----|--------------------------------------------------------------------------------------------------------------------------------------------------------------------------------------------------------------------------------------------------|--------|
| htRNA <sup>Ser</sup> /sephadex-aptamer        | 118 | <u>GCAGCGAUGGCCGAGUGGUUAAGGCGUUGGACUAGUAAUUU</u><br><u>ACGUCGACGGUGACGUCGAUGGUUGCGGAAUCCAUGGGU</u><br><u>CUCCCCGCGCAGGUUCGAACCCUGCUCGCGGCCA</u>                                                                                                  | 38,302 |
| htRNA <sup>Ser</sup> /pre-miR-34a/BCL2-siRNA  | 191 | <u>GCAGCGAUGGCCGAGUGGUUAAGGCGUUGGACUGGCCAGCU</u><br><u>GUGAGUGUUUCUUUACAGUCCACAAAGGCAUCCUUGUGAGC</u><br><u>AAUAGUAAGGAAGGGAUGCCUUGUGGGAACUGUCUAGAAGU</u><br><u>GCUGCACGUUGUUGGCCAAUCCAUGGGGUCUCCCCGCGC</u><br><u>AGGUUCGAACCCUGCUCGCGGCCA</u>    | 61,809 |
| htRNA <sup>Ser</sup> /pre-miR-34a/AGR2-siRNA  | 191 | <u>GCAGCGAUGGCCGAGUGGUUAAGGCGUUGGACUGGCCAGCU</u><br><u>GUGAGUGUUUCUUUUAAGGCUUGACUGUGUGGGCUUGUGAG</u><br><u>CAAUAGUAAGGAAGGCCACACGUCUAAAGCUUUACUAGAAGU</u><br><u>GCUGCACGUUGUUGGCCAAUCCAUGGGGUCUCCCCGCGC</u><br><u>AGGUUCGAACCCUGCUCGCGGCCA</u>   | 61,747 |
| htRNA <sup>Ser</sup> /pre-miR-34a/miR-124-3p  | 191 | <u>GCAGCGAUGGCCGAGUGGUUAAGGCGUUGGACUGGCCAGCU</u><br><u>GUGAGUGUUUCUUUAAGGCACGCGGUGAAUGCCGUUGUGAG</u><br><u>CAAUAGUAAGGAAGCGGUGUCCCGUCGUGCCUUCUAGAAG</u><br><u>UGCUGCACGUUGUUGGCCAAUCCAUGGGGUCUCCCCGCGC</u><br><u>CAGGUUCGAACCCUGCUCGCGGCCA</u>   | 61,809 |
| htRNA <sup>Ser</sup> /pre-miR-34a/let-7c-5p   | 192 | <u>GCAGCGAUGGCCGAGUGGUUAAGGCGUUGGACUGGCCAGCU</u><br><u>GUGAGUGUUUCUUUGAGGUAGUAGGUUGUAUGGUUUGUGAG</u><br><u>CAAUAGUAAGGAAGAACUGUACACCUUACUACCUUUCAGAAG</u><br><u>UGCUGCACGUUGUUGGCCAAUCCAUGGGGUCUCCCCGCGC</u><br><u>CAGGUUCGAACCCUGCUCGCGGCCA</u> | 62,079 |
| htRNA <sup>Ser</sup> /pre-miR-34a/miR-328-3p  | 191 | <u>GCAGCGAUGGCCGAGUGGUUAAGGCGUUGGACUGGCCAGCU</u><br><u>GUGAGUGUUUCUUUCUGGCCUCUCUGCCUCCGUUGUGAG</u><br><u>CAAUAGUAAGGAAGCGGGGGGAGAUAGGGGGCAUAGAAG</u><br><u>UGCUGCACGUUGUUGGCCAAUCCAUGGGGUCUCCCCGCGC</u><br><u>CAGGUUCGAACCCUGCUCGCGGCCA</u>      | 61,879 |
| htRNA <sup>Ser</sup> /pre-miR-34a/miR-200b-3p | 191 | <u>GCAGCGAUGGCCGAGUGGUUAAGGCGUUGGACUGGCCAGCU</u><br><u>GUGAGUGUUUCUUUAUACUGCCUGGUAAUGAUGAUGUGAG</u><br><u>CAAUAGUAAGGAAUCAUCAUUUAGUJGAGUUAUCUAGAAGU</u><br><u>GCUGCACGUUGUUGGCCAAUCCAUGGGGUCUCCCCGCGC</u><br><u>AGGUUCGAACCCUGCUCGCGGCCA</u>     | 61,726 |
| htRNA <sup>Ser</sup> /pre-miR-34a/miR-22-3p   | 191 | <u>GCAGCGAUGGCCGAGUGGUUAAGGCGUUGGACUGGCCAGCU</u><br><u>GUGAGUGUUUCUUUAGCUGCCAGUUGAAGAACUGUUGUGAG</u><br><u>CAAUAGUAAGGAAGCAGUUCUUJAGCUUGGCAGCUCUAGAAGU</u><br><u>GCUGCACGUUGUUGGCCAAUCCAUGGGGUCUCCCCGCGC</u><br><u>AGGUUCGAACCCUGCUCGCGGCCA</u>  | 61,810 |
| htRNA <sup>Ser</sup> /pre-miR-34a/miR-148-3p  | 191 | <u>GCAGCGAUGGCCGAGUGGUUAAGGCGUUGGACUGGCCAGCU</u><br><u>GUGAGUGUUUCUUUCAGUGCACUACAGAACUUUGUUGUGAG</u>                                                                                                                                             | 61,755 |

|                                               |     |                                                                                                                                                                                                                                                                                                                                                              |        |
|-----------------------------------------------|-----|--------------------------------------------------------------------------------------------------------------------------------------------------------------------------------------------------------------------------------------------------------------------------------------------------------------------------------------------------------------|--------|
| htRNA <sup>Ser</sup> /pre-miR-34a/miR-6775-3p | 191 | <p>CAAUAGUAAGGAAGCAAAGUUCGUAUGUGCACUGCUAGAAGU<br/> GCUGCACGUUGUUGGCCCAAUCCAAUGGGGUCUCCCCGCGC<br/> AGGUUCGAACCCUGCUCGCUGCGCCA<br/> GCAGCGAUGGCCGAGUGGUUAAGGCGUUGGACUGGCCAGCU<br/> GUGAGUGUUUCUUAGGCCUGUCCUCUGCCCCAGUUGUGAG<br/> CAAUAGUAAGGAAGCUGGGGCAAGGCGCAGGGCCUAGAAG<br/> UGCUGCACGUUGUUGGCCCAAUCCAAUGGGGUCUCCCCGCGC<br/> CAGGUUCGAACCCUGCUCGCUGCGCCA</p> | 61,844 |
| htRNA <sup>Ser</sup> /pre-miR-34a/NRF2-siRNA  | 191 | <p>GCAGCGAUGGCCGAGUGGUUAAGGCGUUGGACUGGCCAGCU<br/> GUGAGUGUUUCUUAAUUGUCAACUACUGUCAGUUUGUGAG<br/> CAAUAGUAAGGAAACUGACAGAGUAUGACAAUUCUAGAAGU<br/> GCUGCACGUUGUUGGCCCAAUCCAAUGGGGUCUCCCCGCGC<br/> AGGUUCGAACCCUGCUCGCUGCGCCA</p>                                                                                                                                 | 61,732 |

---

**Table S2.** Primers used for the construction of RNA expression plasmids.

| Target ncRNA                                      | Cloning Primers (5' to 3') |                                                                                                                                        |
|---------------------------------------------------|----------------------------|----------------------------------------------------------------------------------------------------------------------------------------|
| <b>htRNA/pre-miR-34a</b>                          |                            |                                                                                                                                        |
| htRNA <sup>Lys</sup> /pre-miR-34a                 | F                          | TTGTAACGCTGAATTCGCTGGATAGCTCAGTTGGTAGAGCATCAGACTGGCC<br>AGCTGTGAGTG                                                                    |
|                                                   | R                          | CTTTCGCTAAGGATCTGCAGTGGGCGCCTGAACAGGGACTTGAACCCTGGAC<br>CCTCAGATTGGGCCAACCAACGTGC                                                      |
| htRNA <sup>Gln</sup> /pre-miR-34a                 | F                          | TTGTAACGCTGAATTCGGTCCCATGGTGTAAATGGTTAGCACTCTGGACTGGCC<br>AGCTGTGAGTG                                                                  |
|                                                   | R                          | CTTTCGCTAAGGATCTGCAGTGGAGGTCCCACCGAGATTTGAACTCGGATCGC<br>TGGATTGGGCCAACCAACGTGC                                                        |
| htRNA <sup>Cys</sup> /pre-miR-34a                 | F                          | TTGTAACGCTGAATTCGGGGGCATAGCTCAGTGGTAGAGCATTGACTGGCCA<br>GCTGTGAGTG                                                                     |
|                                                   | R                          | CTTTCGCTAAGGATCTGCAGTGGAGGGGGCACCTGGATTTGAACCAGGGACC<br>TCTTGATCGGGCCAACAACGTGC                                                        |
| htRNA <sup>Tyr</sup> /pre-miR-34a                 | F                          | TTGTAACGCTGAATTCCTTCGATAGCTCAGTTGGTAGAGCGGAGGACTGGCC<br>AGCTGTGAGTG                                                                    |
|                                                   | R                          | CTTTCGCTAAGGATCTGCAGTGGTCCCTTCGAGCCGGATTTCGAACCAGCGACCT<br>AAGGATCGGGCCAACAACGTGC                                                      |
| htRNA <sup>Ser</sup> /pre-miR-34a                 | F                          | TTGTAACGCTGAATTCGCAGCGATGGCCGAGTGGTTAAGGCGTTGGACTGGC<br>CAGCTGTGAGTG                                                                   |
|                                                   | R                          | CTTTCGCTAAGGATCTGCAGTGGCGCAGCGAGCGGGTTCGAACCTGCGCGG<br>GGAGACCCCATTTGGATTGGGCCAACCAACGTGC                                              |
| htRNA <sup>Leu</sup> /pre-miR-34a                 | F                          | TTGTAACGCTGAATTCACCAGGATGGCCGAGTGGTTAAGGCGTTGGACTGGCC<br>AGCTGTGAGTG                                                                   |
|                                                   | R                          | CTTTCGCTAAGGATCTGCAGTGGTACCAGGAGTGGGGTTCGAACCCACGCGG<br>ACATATGTCCATTGGATCGGGCCAACAACGTGC                                              |
| <b>htRNA<sup>Leu</sup>/pre-miR-34a</b>            |                            |                                                                                                                                        |
| htRNA <sup>Leu</sup> /sephadex-<br>aptamer        | F                          | TTGTAACGCTGAATTCACCAGGATGGCCGAGTGGTTAAGGCGTTGGACTAGTA<br>ATTTACGTCGACGGTGACGTCGATGGTTGCG                                               |
|                                                   | R                          | CTTTCGCTAAGGATCTGCAGTGGTACCAGGAGTGGGGTTCGAACCCACGCGG<br>ACATATGTCCATTGGATCCCAGCAACCATCGACGTCAC                                         |
| htRNA <sup>Leu</sup> /pre-miR-<br>34a/miR-200b-3p | F                          | TTGTAACGCTGAATTCACCAGGATGGCCGAGTGGTTAAGGCGTTGGACTGGCC<br>AGCTGTGAGTGTTCCTTTAATACTGCCTGGTAATGATGATGTGAGCAATAGTAA<br>GGAATCATCA          |
|                                                   | R                          | CTTTCGCTAAGGATCTGCAGTGGTACCAGGAGTGGGGTTCGAACCCACGCGG<br>ACATATGTCCATTGGATCGGGCCAACAACGTGCAGCACTTCTAGAATACTGCA<br>CTATAATGATGATTCCTTACT |
| htRNA <sup>Leu</sup> /pre-miR-<br>34a/miR-148-3p  | F                          | TTGTAACGCTGAATTCACCAGGATGGCCGAGTGGTTAAGGCGTTGGACTGGCC<br>AGCTGTGAGTGTTCCTTTTTCAGTGCACACAGAACTTTGTTGTGAGCAATAGTAA<br>GGAAGCAAAGTTC      |
|                                                   | R                          | CTTTCGCTAAGGATCTGCAGTGGTACCAGGAGTGGGGTTCGAACCCACGCGG<br>ACATATGTCCATTGGATCGGGCCAACAACGTGCAGCACTTCTAGCAGTGCACA<br>TACGAACCTTTGCTTCCTT   |
| htRNA <sup>Leu</sup> /pre-miR-<br>34a/miR-22-3p   | F                          | TTGTAACGCTGAATTCACCAGGATGGCCGAGTGGTTAAGGCGTTGGACTGGCC<br>AGCTGTGAGTGTTCCTTAAAGCTGCCAGTTGAAGAACTGTTGTGAGCAATAGTAA<br>GGAAGTAGTTCTT      |
|                                                   | R                          | CTTTCGCTAAGGATCTGCAGTGGTACCAGGAGTGGGGTTCGAACCCACGCGG<br>ACATATGTCCATTGGATCGGGCCAACAACGTGCAGCACTTCTAGAGCTGCCAA<br>GCTAAGAATACTTCCTTAC   |
| htRNA <sup>Leu</sup> /pre-miR-<br>34a/miR-6775-3p | F                          | TTGTAACGCTGAATTCACCAGGATGGCCGAGTGGTTAAGGCGTTGGACTGGCC<br>AGCTGTGAGTGTTCCTTAGGCCCTGTCTCTGCCCCAGTTGTGAGCAATAGTA<br>AGGAAGCTGGGGC         |
|                                                   | R                          | CTTTCGCTAAGGATCTGCAGTGGTACCAGGAGTGGGGTTCGAACCCACGCGG<br>ACATATGTCCATTGGATCGGGCCAACAACGTGCAGCACTTCTAGGGCCCTGCG<br>CCTTGCCCCAGCTTCCTTA   |
| htRNA <sup>Leu</sup> /pre-miR-<br>34a/miR-133a-3p | F                          | TTGTAACGCTGAATTCACCAGGATGGCCGAGTGGTTAAGGCGTTGGACTGGCC<br>AGCTGTGAGTGTTCCTTTTGGTCCCCTTCAACCAGCTGTGTGAGCAATAG                            |

|                                              |   |                                                                                                                                           |
|----------------------------------------------|---|-------------------------------------------------------------------------------------------------------------------------------------------|
|                                              | R | CTTTCGCTAAGGATCTGCAGTGGTACCAGGAGTGGGGTTCGAACCCACGCGG<br>ACATATGTCCATTGGATCGGGCCAACAACGTGCAGCACTTCTAGTTGGTCCCA<br>CTTAACCAGCTGCTTCCTTACTAT |
| htRNA <sup>Leu</sup> /pre-miR-34a/miR-124-3p | F | uses the same primer as in htRNA <sup>Leu</sup> /pre-miR-34a plus corresponding btRNA/hsa-miR-34a plasmid as template                     |
|                                              | R | uses the same primer as in htRNA <sup>Leu</sup> /pre-miR-34a plus corresponding btRNA/hsa-miR-34a plasmid as template                     |
| htRNA <sup>Leu</sup> /pre-miR-34a/let-7c-5p  | F | uses the same primer as in htRNA <sup>Leu</sup> /pre-miR-34a plus corresponding btRNA/hsa-miR-34a plasmid as template                     |
|                                              | R | uses the same primer as in htRNA <sup>Leu</sup> /pre-miR-34a plus corresponding btRNA/hsa-miR-34a plasmid as template                     |
| htRNA <sup>Leu</sup> /pre-miR-34a/NRF2-siRNA | F | uses the same primer as in htRNA <sup>Leu</sup> /pre-miR-34a plus corresponding btRNA/hsa-miR-34a plasmid as template                     |
|                                              | R | uses the same primer as in htRNA <sup>Leu</sup> /pre-miR-34a plus corresponding btRNA/hsa-miR-34a plasmid as template                     |
| htRNA <sup>Leu</sup> /pre-miR-34a/miR-122-5p | F | uses the same primer as in htRNA <sup>Leu</sup> /pre-miR-34a plus corresponding btRNA/hsa-miR-34a plasmid as template                     |
|                                              | R | uses the same primer as in htRNA <sup>Leu</sup> /pre-miR-34a plus corresponding btRNA/hsa-miR-34a plasmid as template                     |
| htRNA <sup>Leu</sup> /pre-miR-34a/miR-328-3p | F | uses the same primer as in htRNA <sup>Leu</sup> /pre-miR-34a plus corresponding btRNA/hsa-miR-34a plasmid as template                     |
|                                              | R | uses the same primer as in htRNA <sup>Leu</sup> /pre-miR-34a plus corresponding btRNA/hsa-miR-34a plasmid as template                     |
| htRNA <sup>Leu</sup> /pre-miR-34a/miR-7-1-5p | F | TTGTAACGCTGAATTCACCAGGATGGCCGAGTGGTTAAGGCGTTGGACTGGCC<br>AGCTGTGAGTGTTCCTTTGGAAGACTAGTGATTTTGTGTGTGAGCAATAGTAA<br>GGAACAACAAAAAT          |
|                                              | R | CTTTCGCTAAGGATCTGCAGTGGTACCAGGAGTGGGGTTCGAACCCACGCGG<br>ACATATGTCCATTGGATCGGGCCAACAACGTGCAGCACTTCTAGGGAAGACTG<br>AGTATTTTGTGTTCCTTA       |
| htRNA <sup>Leu</sup> /pre-miR-34a/miR-92a-3p | F | TTGTAACGCTGAATTCACCAGGATGGCCGAGTGGTTAAGGCGTTGGACTGGCC<br>AGCTGTGAGTGTTCCTTTATTGCACTTGTCCCGCCTGTTGTGAGCAATAGTAA<br>GGAAACAGGCCGG           |
|                                              | R | CTTTCGCTAAGGATCTGCAGTGGTACCAGGAGTGGGGTTCGAACCCACGCGG<br>ACATATGTCCATTGGATCGGGCCAACAACGTGCAGCACTTCTAGATTGCACTAT<br>GTCCGGCCTGTTTCCTT       |
| htRNA <sup>Leu</sup> /pre-miR-34a/miR-126-3p | F | TTGTAACGCTGAATTCACCAGGATGGCCGAGTGGTTAAGGCGTTGGACTGGCC<br>AGCTGTGAGTGTTCCTTTCTGACCGTGAGTAATAATGCGTGTGAGCAATAGTAA<br>GGAATGCATTATT          |
|                                              | R | CTTTCGCTAAGGATCTGCAGTGGTACCAGGAGTGGGGTTCGAACCCACGCGG<br>ACATATGTCCATTGGATCGGGCCAACAACGTGCAGCACTTCTAGCGTACCATA<br>GAGAATAATGCATTTCCTT      |
| htRNA <sup>Leu</sup> /pre-miR-34a/miR-132-3p | F | TTGTAACGCTGAATTCACCAGGATGGCCGAGTGGTTAAGGCGTTGGACTGGCC<br>AGCTGTGAGTGTTCCTTTAACAGTCTACAGCCATGGTCGTGTGAGCAATAGTAA<br>GGAACGACCGTGG          |
|                                              | R | CTTTCGCTAAGGATCTGCAGTGGTACCAGGAGTGGGGTTCGAACCCACGCGG<br>ACATATGTCCATTGGATCGGGCCAACAACGTGCAGCACTTCTAGAACAATCTG<br>ACACCACGGTCGTTTCCTT      |
| htRNA <sup>Leu</sup> /pre-miR-34a/miR-137-3p | F | TTGTAACGCTGAATTCACCAGGATGGCCGAGTGGTTAAGGCGTTGGACTGGCC<br>AGCTGTGAGTGTTCCTTTATTGCTTAAGAATACGCGTAGGTGAGCAATAGTAA<br>GGACTACGCGTA            |
|                                              | R | CTTTCGCTAAGGATCTGCAGTGGTACCAGGAGTGGGGTTCGAACCCACGCGG<br>ACATATGTCCATTGGATCGGGCCAACAACGTGCAGCACTTCTAGTACCACCCG<br>AAGATACGCGTAGTCCTTACT    |
| htRNA <sup>Leu</sup> /pre-miR-34a/miR-140-5p | F | TTGTAACGCTGAATTCACCAGGATGGCCGAGTGGTTAAGGCGTTGGACTGGCC<br>AGCTGTGAGTGTTCCTTCAGTGGTTTTACCCTATGGTAGTGTGAGCAATAGTAA<br>GGAACACTACATA          |
|                                              | R | CTTTCGCTAAGGATCTGCAGTGGTACCAGGAGTGGGGTTCGAACCCACGCGG<br>ACATATGTCCATTGGATCGGGCCAACAACGTGCAGCACTTCTAGAGTGGTTCCG<br>TACCTATGGTAGTTTCCTT     |
| htRNA <sup>Leu</sup> /pre-miR-34a/miR-141-3p | F | TTGTAACGCTGAATTCACCAGGATGGCCGAGTGGTTAAGGCGTTGGACTGGCC<br>AGCTGTGAGTGTTCCTTTAACACTGTCTGGTAAAGATGGTGTGAGCAATAGTAA<br>GGAACCATCTTTA          |

|                                              |   |                                                                                                                                       |
|----------------------------------------------|---|---------------------------------------------------------------------------------------------------------------------------------------|
|                                              | R | CTTTCGCTAAGGATCTGCAGTGGTACCAGGAGTGGGGTTCGAACCCACGCGG<br>ACATATGTCCATTGGATCGGGCCAACAACGTGCAGCACTTCTAGAACACTGTA<br>CTGTAAAGATGGTTCCTT   |
| htRNA <sup>Leu</sup> /pre-miR-34a/miR-142-3p | F | TTGTAACGCTGAATTCACCAGGATGGCCGAGTGGTTAAGGCGTTGGACTGGCC<br>AGCTGTGAGTGTTCCTTTGTAGTGTTCCTACTTTATGGATGTGAGCAATAGTAA<br>GGAATCCATAAAG      |
|                                              | R | CTTTCGCTAAGGATCTGCAGTGGTACCAGGAGTGGGGTTCGAACCCACGCGG<br>ACATATGTCCATTGGATCGGGCCAACAACGTGCAGCACTTCTGAGTAGTGCTG<br>TCCACTTTATGGATTCCCTT |
| htRNA <sup>Leu</sup> /pre-miR-34a/miR-194-3p | F | TTGTAACGCTGAATTCACCAGGATGGCCGAGTGGTTAAGGCGTTGGACTGGCC<br>AGCTGTGAGTGTTCCTTTGTAACAGCAACTCCATGTGGATGTGAGCAATAGTAA<br>GGAATCCACGTG       |
|                                              | R | CTTTCGCTAAGGATCTGCAGTGGTACCAGGAGTGGGGTTCGAACCCACGCGG<br>ACATATGTCCATTGGATCGGGCCAACAACGTGCAGCACTTCTAAGTAACAGCT<br>AACCCACGTGGATTCCCTTA |
| htRNA <sup>Leu</sup> /pre-miR-34a/miR-205-5p | F | TTGTAACGCTGAATTCACCAGGATGGCCGAGTGGTTAAGGCGTTGGACTGGCC<br>AGCTGTGAGTGTTCCTTTCTTCATTCCACCGGAGTCTGTGTGAGCAATAGTAA<br>GGAACAGACTCCG       |
|                                              | R | CTTTCGCTAAGGATCTGCAGTGGTACCAGGAGTGGGGTTCGAACCCACGCGG<br>ACATATGTCCATTGGATCGGGCCAACAACGTGCAGCACTTCTAGCCTTCATTAC<br>CACGGAGTCTGTTCCCTT  |

---

**htRNA<sup>Ser</sup>/pre-miR-34a**

|                                               |   |                                                                                                                                   |
|-----------------------------------------------|---|-----------------------------------------------------------------------------------------------------------------------------------|
| htRNA <sup>Ser</sup> /sephadex-aptamer        | F | TTGTAACGCTGAATTCGCAGCGATGGCCGAGTGGTTAAGGCGTTGGACTAGTA<br>ATTTACGTCGACGGTGACGTCGATGGTTG                                            |
|                                               | R | CTTTCGCTAAGGATCTGCAGTGGCGCAGCGAGCAGGGTTCGAACCTGCGCGG<br>GGAGACCCCATTGGATTCCGCAACCATCGACGTC                                        |
| htRNA <sup>Ser</sup> /pre-miR-34a/BCL2-siRNA  | F | TTGTAACGCTGAATTCGCAGCGATGGCCGAGTGGTTAAGGCGTTGGACTGGC<br>CAGCTGTGAGTGTTCCTTTACAGTTCACAAAGGCATCCTTGTGAGCAATAGTA<br>AGGAAGGGATGCCTTG |
|                                               | R | CTTTCGCTAAGGATCTGCAGTGGCGCAGCGAGCAGGGTTCGAACCTGCGCGG<br>GGAGACCCCATTGGATTGGGCCAACAACGTGCAGCACTTCTAGACAGTTCCTCA<br>CAAGGCATCCCTTCC |
| htRNA <sup>Ser</sup> /pre-miR-34a/AGR2-siRNA  | F | TTGTAACGCTGAATTCGCAGCGATGGCCGAGTGGTTAAGGCGTTGGACTGGC<br>CAGCTGTGAGTGTTCCTTTAAAGCTTGACTGTGTGGGCTTGTGAGCAATAGTA<br>AGGAAGGCCACACGT  |
|                                               | R | CTTTCGCTAAGGATCTGCAGTGGCGCAGCGAGCAGGGTTCGAACCTGCGCGG<br>GGAGACCCCATTGGATTGGGCCAACAACGTGCAGCACTTCTAGTAAAGCTTAG<br>ACGTGTGGGCCTTCC  |
| htRNA <sup>Ser</sup> /pre-miR-34a/miR-124-3p  | F | uses the same primer as in htRNA <sup>Ser</sup> /pre-miR-34a plus corresponding btRNA/hsa-miR-34a plasmid as template             |
|                                               | R | uses the same primer as in htRNA <sup>Ser</sup> /pre-miR-34a plus corresponding btRNA/hsa-miR-34a plasmid as template             |
| htRNA <sup>Ser</sup> /pre-miR-34a/let-7c-5p   | F | uses the same primer as in htRNA <sup>Ser</sup> /pre-miR-34a plus corresponding btRNA/hsa-miR-34a plasmid as template             |
|                                               | R | uses the same primer as in htRNA <sup>Ser</sup> /pre-miR-34a plus corresponding btRNA/hsa-miR-34a plasmid as template             |
| htRNA <sup>Ser</sup> /pre-miR-34a/miR-328-3p  | F | uses the same primer as in htRNA <sup>Ser</sup> /pre-miR-34a plus corresponding btRNA/hsa-miR-34a plasmid as template             |
|                                               | R | uses the same primer as in htRNA <sup>Ser</sup> /pre-miR-34a plus corresponding btRNA/hsa-miR-34a plasmid as template             |
| htRNA <sup>Ser</sup> /pre-miR-34a/miR-200b-3p | F | uses the same primer as in htRNA <sup>Ser</sup> /pre-miR-34a plus corresponding btRNA/hsa-miR-34a plasmid as template             |
|                                               | R | uses the same primer as in htRNA <sup>Ser</sup> /pre-miR-34a plus corresponding btRNA/hsa-miR-34a plasmid as template             |
| htRNA <sup>Ser</sup> /pre-miR-34a/miR-22-3p   | F | uses the same primer as in htRNA <sup>Ser</sup> /pre-miR-34a plus corresponding btRNA/hsa-miR-34a plasmid as template             |
|                                               | R | uses the same primer as in htRNA <sup>Ser</sup> /pre-miR-34a plus corresponding btRNA/hsa-miR-34a plasmid as template             |
| htRNA <sup>Ser</sup> /pre-miR-34a/miR-148-3p  | F | uses the same primer as in htRNA <sup>Ser</sup> /pre-miR-34a plus corresponding btRNA/hsa-miR-34a plasmid as template             |
|                                               | R | uses the same primer as in htRNA <sup>Ser</sup> /pre-miR-34a plus corresponding btRNA/hsa-miR-34a plasmid as template             |



|                                               |   |                                                                                                                       |
|-----------------------------------------------|---|-----------------------------------------------------------------------------------------------------------------------|
| htRNA <sup>Ser</sup> /pre-miR-34a/miR-6775-3p | F | uses the same primer as in htRNA <sup>Ser</sup> /pre-miR-34a plus corresponding btRNA/hsa-miR-34a plasmid as template |
|                                               | R | uses the same primer as in htRNA <sup>Ser</sup> /pre-miR-34a plus corresponding btRNA/hsa-miR-34a plasmid as template |
| htRNA <sup>Ser</sup> /pre-miR-34a/NRF2-siRNA  | F | uses the same primer as in htRNA <sup>Ser</sup> /pre-miR-34a plus corresponding btRNA/hsa-miR-34a plasmid as template |
|                                               | R | uses the same primer as in htRNA <sup>Ser</sup> /pre-miR-34a plus corresponding btRNA/hsa-miR-34a plasmid as template |

---

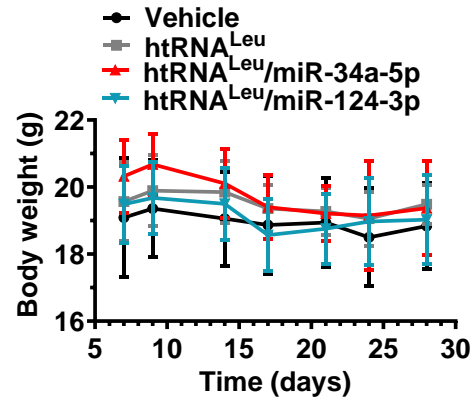

**Figure S1.** Animal body weights did not differ between different treatment groups (not significant between any groups; 2-way ANOVA with Bonferroni post-tests).
